# Supplementary material for: Receptor for Activated C Kinase1B (OsRACK1B) Impairs Fertility in Rice through NADPH-Dependent H2O2 Signaling Pathway
Source: MDPI journal article supplement (doi:10.3390/ijms23158455), 2022-07-30
Supplement: s1 [file s1]

## Supporting Information

The following Supporting Information is available for this article:

**Figure S1** Identification of T-DNA insertion mutant of OsRACK1B (LOC\_Os05g47890)

**Figure S2** Mapping of T-DNA by Thermal Asymmetric Interlaced PCR (TAIL-PCR)

**Figure S3** qRT-PCR of *OsRbohB* gene

**Figure S4** BiFC analysis of the interaction between rice RACK1B and RBOHD in the Nucleus and Cytoplasm in onion epidermal cells

**Figure S5** 4',6-Diamidino-2-phenylindole (DAPI)-stained pollen grains from indehiscence anthers of OsRACK1B-OX transgenic plants

**Table S1** Primers used for genotyping of T-DNA insertional mutagenesis lines

**Table S2** Primers used for quantitative Real Time PCR

**Table S3** Primers used for TAIL-PCR

**Table S4** Primers used for BiFC assay and plasmid sequencing

**Methods S1** TAIL-PCR protocol

**Methods S2** BiFC plasmid construction

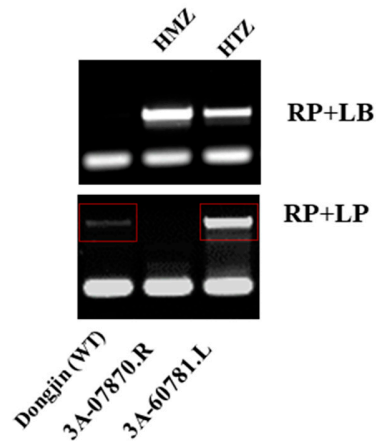

**Figure S1. Identification of T-DNA insertion mutant of RACK1B (LOC\_Os05g47890).** Genotyping PCR of Salk lines PFG\_3A-07870.R and PFG\_3A-60781.L by T-DNA and gene-specific primers; Upper panel: T-DNA left border primer (LB) and a gene-specific primer (RP) amplified a ~500-bp PCR product from PFG\_3A-07870.R DNA (lane 2) and PFG\_3A-60871.L DNA (lane 3) but not from wild-type (WT) DNA (lane 1); Lower Panel: gene-specific primers (LP and RP) spanning the insertion site amplified a 1000-bp PCR product from wild-type DNA (lane 1, red box) and PFG\_3A-60870.L DNA (lane 3, red box) but not from PFG\_3A-07870.R DNA (lane 2) demonstrating homozygous (HMZ) T-DNA insertion in the PFG\_3A-07870.R line and heterozygous T-DNA insertion in the PFG\_3A-60871.L line.

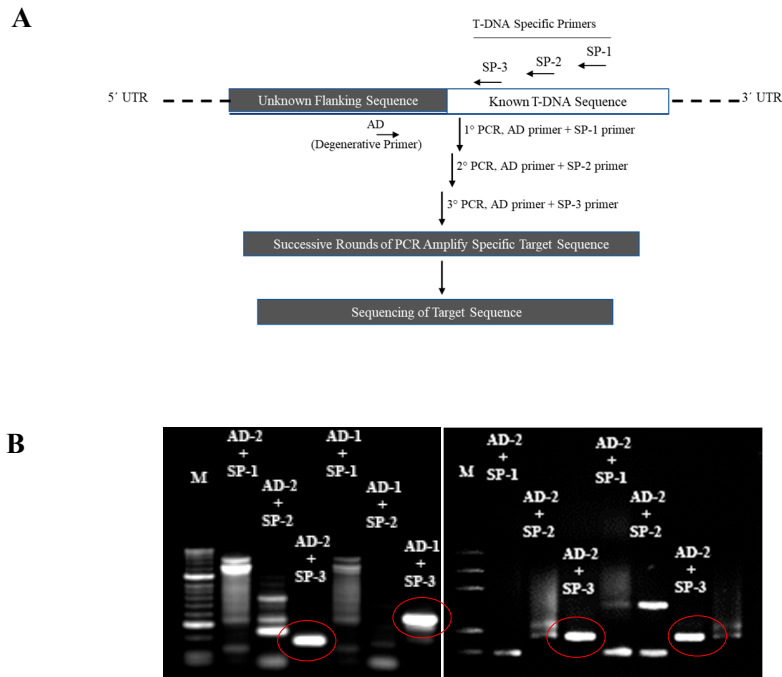

**Figure S2. Mapping of T-DNA by Thermal Asymmetric Interlaced PCR (TAIL-PCR).**

Amplification of T-DNA flanking regions from representative OsRACK1B overexpressed rice plants using TAIL-PCR.

**(A)** Schematic diagram of primers design and TAIL PCR process. This strategy involves three consecutive rounds of PCR, performed with a set of three nested T-DNA specific primers (SP-1, SP-2 and SP-3) and a small, arbitrary primer, AD. The positions of three nested primers in the T-DNA region and arbitrary degenerate primer are indicated by arrows.

**(B)** Gel electrophoresis of Primary (1°), Secondary (2°) and Tertiary (3°) TAIL-PCR products from putative transgenic lines with two different arbitrary primers (AD-1 and AD-2) and three T-DNA specific primers. The products of the first, second and third round amplification of each transformants were shown from left to right. Lane M, DNA molecular weight marker. Circle indicates putative T-DNA insertion specific band that are excised from agarose gel for sequencing.

## Methods S1

**TAIL-PCR protocol:** The T-DNA flanking sequence were isolated from T-DNA tagged mutants rice plants by TAIL-PCR using modified method adapted from Liu & Whittier, 1995 and Wu et al., (2015).

| 1° PCR reaction (μL)      |            |         | 2° PCR reaction (μL)          |            |       | 3° PCR reaction (μL)          |            |       |
|---------------------------|------------|---------|-------------------------------|------------|-------|-------------------------------|------------|-------|
| PCR Master Mix            | 15         |         | PCR Master Mix                | 15         |       | PCR Master Mix                | 15         |       |
| Dimethyl sulfoxide        | 1.0 (3.3%) |         | DMSO                          | 1.0 (3.3%) |       | DMSO                          | 1.0 (3.3%) |       |
| MgCl <sub>2</sub> (50mM)  | 0.75       |         | MgCl <sub>2</sub> (50mM)      | 0.75       |       | MgCl <sub>2</sub> (50mM)      | 0.75       |       |
| AD Primer(10pmol/mL)      | 8.0        |         | AD Primer(10pmol/mL)          | 8.0        |       | AD Primer(10pmol/mL)          | 8.0        |       |
| SP1 Primer (10pmol/mL)    | 1.0        |         | SP2 Primer (10pmol/mL)        | 1.0        |       | SP3 Primer (10pmol/mL)        | 1.0        |       |
| Genomic DNA               | 1.0        |         | 1° PCR Product (diluted 100X) | 1.0        |       | 2° PCR Product (diluted 100X) | 1.0        |       |
| Milli-Q H <sub>2</sub> O  | 3.25       |         | Milli-Q H <sub>2</sub> O      | 3.25       |       | Milli-Q H <sub>2</sub> O      | 3.25       |       |
| Total                     | 30         |         | Total                         | 30         |       | Total                         | 30         |       |
| Cycle                     | Temp.      | time    | Cycle                         | Temp.      | time  | Cycle                         | Temp.      | time  |
| 1                         | 95°C       | 2 min   | 1                             | 95°C       | 2 min | 1                             | 95°C       | 2 min |
| 5                         | 94°C       | 30 s    | 15                            | 94°C       | 30 s  | 15                            | 94°C       | 30 s  |
|                           | 67°C       | 1 min   |                               | 60°C       | 1 min |                               | 60°C       | 1 min |
|                           | 72°C       | 2.5 min |                               | 72°C       | 2 min |                               | 72°C       | 2 min |
| 1                         | 94°C       | 30 s    |                               | 94°C       | 30 s  |                               | 94°C       | 30 s  |
|                           | 25°C       | 3 min;  |                               | 60°C       | 1 min |                               | 60°C       | 1 min |
| ramping to 72 C, 0.3 C/s; |            |         |                               | 72°C       | 2 min |                               | 72°C       | 2 min |
|                           | 72°C       | 2.5 min |                               | 94°C       | 30 s  |                               | 94°C       | 30 s  |
| 15                        | 94°C       | 10 s    |                               | 44°C       | 1 min |                               | 44°C       | 1 min |
|                           | 67°C       | 1 min   |                               | 72°C       | 2 min |                               | 72°C       | 2 min |
|                           | 72°C       | 2.5 min | 1                             | 72°C       | 5 min | 1                             | 72°C       | 5 min |
|                           | 94°C       | 10 s    |                               |            |       |                               |            |       |
|                           | 67°C       | 1 min   |                               |            |       |                               |            |       |
|                           | 72°C       | 2.5 min |                               |            |       |                               |            |       |
|                           | 94°C       | 10 s    |                               |            |       |                               |            |       |
|                           | 44°C       | 1 min   |                               |            |       |                               |            |       |
|                           | 72°C       | 2.5 min |                               |            |       |                               |            |       |
| 1                         | 72°C       | 5 min   |                               |            |       |                               |            |       |

**Agarose Electrophoresis of Products:**  
All PCR products were run in 1.5% agarose gel and desired band was gel extracted for sequencing.

**Wu L, Di DW, Zhang D, Song B, Luo P, Guo GQ. 2015.** Frequent problems and their resolutions by using thermal asymmetric interlaced PCR (TAIL-PCR) to clone genes in Arabidopsis T-DNA tagged mutants. *Biotechnol Biotechnol Equip* **29**(2): 260-267.

**Liu Y-G, Whittier RF. 1995.** Thermal asymmetric interlaced PCR: automatable amplification and sequencing of insert end fragments from P1 and YAC clones for chromosome walking. *Genomics* **25**(3): 674-681.

## Methods S2: Plasmid construction for BiFC assay

Total RNA was extracted from eight-week-old wild-type rice leaves using Trizol reagent (Thermo Fisher, USA) according to the manufacturer's instructions. 1 µg of purified total RNA per sample was reverse transcribed using SuperScript™ IV VILO Master Mix kit (Thermo Fisher, USA) following manufacturers instruction. Full-length coding sequences of *OsRack1b* and 1-1300 bp of *OsRbohD* without stop codons were amplified by PCR using Q5® High-Fidelity DNA Polymerase (NEB, MA, USA). Amplicons were purified (QIAquick PCR Purification Kit, Qiagen, USA), Sanger sequenced (Genewiz, NJ) and cloned into the Gateway entry vector pCR8/GW/TOPO (Invitrogen, CA) according to the manufacturer's instruction. Orientation was confirmed by Sanger sequencing the plasmids from selected colonies. Entry clones were sub-cloned into the BiFC plasmid sets pSAT5-DEST-cEYFP(175-end)-C1(pE3130), pSAT5(A)-DEST-cEYFP(175-end)-N1 (pE3132), pSAT4(A)-DESTnEYFP(1-174)-N1 (pE3134), and pSAT4-DEST-nEYFP(1-174)-C1 (pE3136) destination vectors ([https://www.bio.purdue.edu/people/faculty/gelvin/nsf/protocols\\_vectors.htm](https://www.bio.purdue.edu/people/faculty/gelvin/nsf/protocols_vectors.htm)) using Gateway LR clonase-II enzyme mix (Invitrogen, CA). Orientation was further confirmed by Sanger sequencing of the fusion plasmids isolated (PureLink® HiPure Plasmid Midiprep Kit, Invitrogen) from selected colonies using primers listed in SI Table 4. Each pair of recombinant plasmids encoding nEYFP and cEYFP fusions was mixed 1:1 (w/w), co-bombarded with gold particles (1 µm, Au, Bio-Rad) into onion epidermal layers using a Helios DNA particle delivery system (Biolistic PDS-1000/He, Bio-Rad) as described by Hollender and Liu (2010). Bombarded epidermal cells were incubated in MS liquid media with for 16–24 hr at 22°C under dark incubation, followed by observation and image analysis.

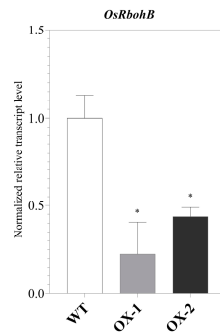

**Figure S3. The qRT-PCR analysis showing transcript level of *OsRbohB* gene.** The transcript levels were normalized using *OsActin-1*(LOC4333919). Error bars indicate the standard errors (SE) of the means of three technical repeats. Single asterisks indicate statistical significance: \* $P < 0.05$  compared to wild-type (Student's t-test). Primers are listed in Table S2.

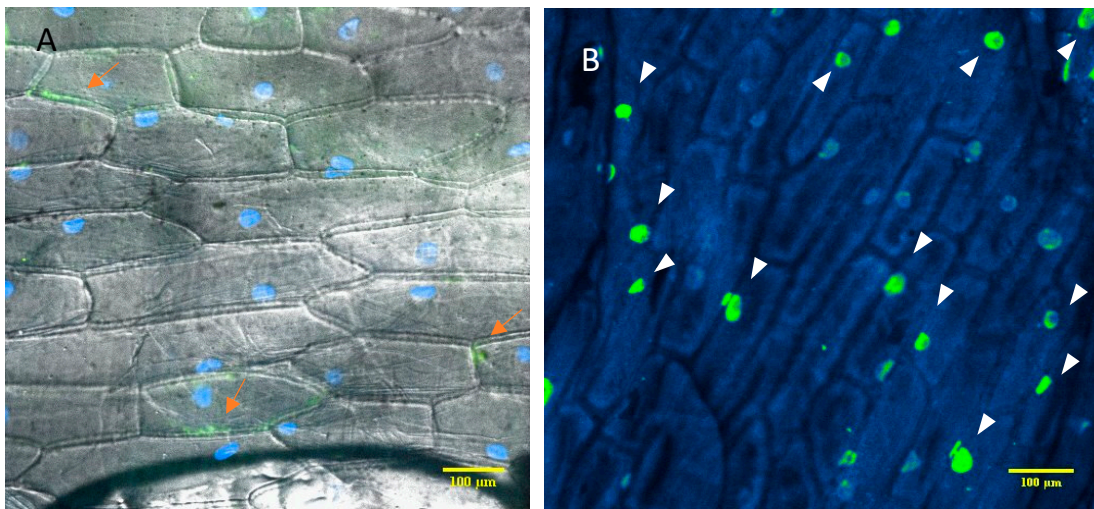

**Figure S4. BiFC analysis of the interaction between rice RACK1B and RBOHD in the Nucleus and Cytoplasm in onion epidermal cells.** (A) OsRACK1B and OsRBOHD interacts in the cytoplasm in normal condition. (B) The interaction complex moves to the nucleus when onion epidermal cells were incubated with salinity (200 mM NaCl) stress. Fluorescence microscopy images of onion epidermal cells co-expressing RACK1B and RBOHD fused either with the N-terminal part of YFP (nYFP) or the C-terminal part (cYFP), respectively. Images were recorded 16-24 hr after bombardment and visualized using spinning-disk confocal microscopy equipped with 10X 0.45 NA Plan Apo Lambda objective. Reconstitution of functional YFP as detected by YFP fluorescence filters (excitation 488 nm, emission 525 nm) occurs in the cytoplasm (A, orange arrow) in normal condition and in the nucleus (B, white arrowhead) during salt stress. The nuclei were stained by DAPI (4',6-diamidino-2-phenylindole, blue). Bars = 100  $\mu\text{m}$ .

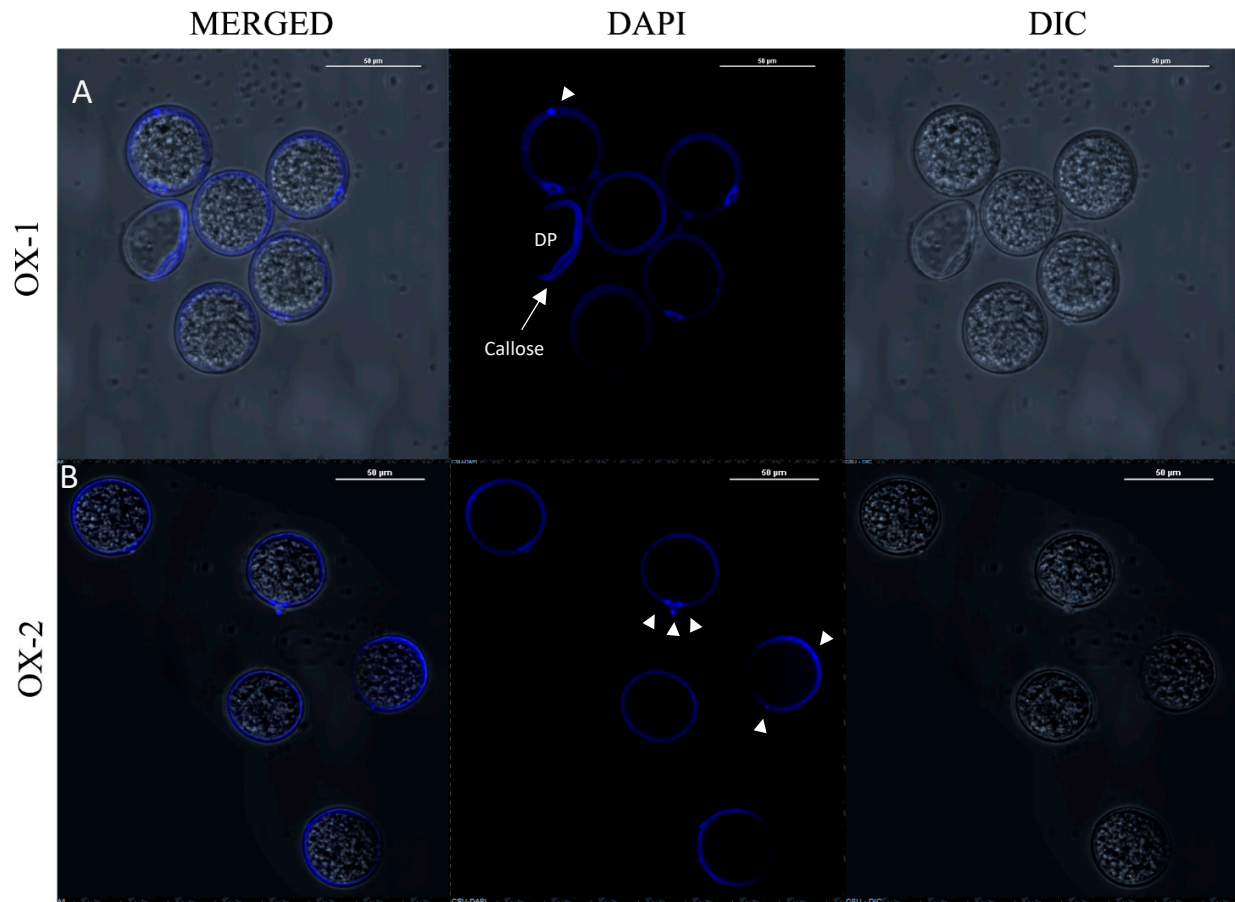

**Figure S5. 4',6-Diamidino-2-phenylindole (DAPI)-stained pollen grains from indehiscence anthers of *OsRACK1B*-OX transgenic plants: (A, top row) Pollen from OX-1 plant showing only one single nucleate pollen (arrowhead) and a defective pollen, arrow indicates callose deposition; (B, bottom row) Pollen from OX-2 plant showing one normal tricellular pollen and one binucleate pollen as indicated by arrowheads. DP, Defective Pollen; Bars = 50 µm.**

**Table S1: Primers used for genotyping of T-DNA insertional mutagenesis lines**

| Primers | Insertion Chromosome | Sequence (5'→3')       | Purpose                                                        |
|---------|----------------------|------------------------|----------------------------------------------------------------|
| LP      | Chr05                | CAGTTGAAAACAGAAGGCAGG  | Genotyping of Salk line:<br>PFG_3A-60871.L &<br>PFG_3A-07870.R |
| RP      |                      | CGCACCTTCTCACTAGAGTGG  |                                                                |
| LB+93   | T-DNA left border    | CTAGAGTCGAGAATTCAGTACA |                                                                |

**Table S2: Primers used for quantitative Real time PCR (qRT-PCR)**

| Gene            | Accession no. | Primer Sequence (5'→3')                                                       | Product Size (bp) |
|-----------------|---------------|-------------------------------------------------------------------------------|-------------------|
| <i>OsRACK1B</i> | Os05g47890    | Forward-<br>ATGGCGGGCCAGGAGTCGCTCACC<br>Reverse-<br>TCCCAGGATCCCGAGAGCGCGAACT | 290               |
| <i>OsRbohD</i>  | Os05g38980    | F-CACAAGGTTATCGCACTGACG<br>R-AGCGATGAGTATGTTGGTTGA                            | 158               |
| <i>OsCatB</i>   | Os06g51150    | Forward-<br>GTTA ACTACTTCCCTTCAAGGTT<br>Reverse- GCATCACACTGCGACCAGTAG        | 260               |
| <i>OsRbohB</i>  | Os01g25820    | Forward- CCTAGTGGAAGAAGCTGTGCT<br>Reverse-<br>CACTATGAAAGGGAACATCACAA         | 100               |
| <i>OsActin1</i> | Os03g50885    | Forward-TCCATCTTGGCATCTCTCAG<br>Reverse-TGGCTTAGCATTCTTGGGTC                  | 126               |

**Table S3: Primers used for TAIL-PCR**

| Primer  | Sequence (5'→3')          | Tm | Purpose                                        |
|---------|---------------------------|----|------------------------------------------------|
| AD1     | NGTCGASWGANAWGAA          | 48 | Arbitrary primer for TAIL-PCR                  |
| AD2     | GTNCGASWCANAWGTT          | 46 |                                                |
| AD3     | WGTGNAGWANCANAGA          | 44 |                                                |
| SP1-200 | AAGTGACAGATAGCTGGGCAATG   | 63 | Gene specific primer 200 bp from the insertion |
| SP2-150 | GAGTAGACGAGAGTGTCGTGCTCC  | 64 | 150 bp from insertion                          |
| SP3-65  | GTCCGCAATGTGTTATTAAGTTGTC | 61 | 65 bp from insertion                           |



**Table S4: Primers used for BiFC assay and plasmid sequencing**

| Gene/Primer                | Accession/V<br>ector         | Primer sequence (5'→3')                                                                                             | Purpose                                                         |
|----------------------------|------------------------------|---------------------------------------------------------------------------------------------------------------------|-----------------------------------------------------------------|
| <i>OsRbohD</i> -1300<br>bp | Os05g38980                   | Forward- ATGGCGGGGGACTACGT<br>Rev1276-<br>GTGTCGCAAGTGTGAACGAGAA                                                    | N-terminal<br>CDS<br>amplification                              |
| <i>OsRACK1B</i>            | Os05g47890                   | Forward- ATGGCGGGCCAGGAGTCG<br>Rev with stop-<br>CTAGATTGCATAGCCGCCAAACC<br>Rev w/o stop-<br>GATTGCATAGCCGCCAAACCCT | Full length<br>CDS<br>amplification                             |
| <i>OsRACK1B</i> -445       |                              | Forward-GGCGAGTGCAAGTACACCAT                                                                                        | Sanger<br>Sequencing                                            |
|                            |                              | Reverse-ACCTCAAGCCAGAAGTCCAG                                                                                        | Sanger<br>sequencing                                            |
| GW1                        | TOPO TA<br>cloning<br>vector | GTTGCAACAAATTGATGAGCAATGC                                                                                           | Sequencing<br>the insert                                        |
| GW2                        |                              | GTTGCAACAAATTGATGAGCAATTA                                                                                           |                                                                 |
| EGFP-N                     | Destination<br>Vector        | CGTCGCCGTCCAGCTCGACCA                                                                                               | Sequencing<br>OsRACK1B<br>and<br>OsRBOHD-<br>n/c-YFP<br>vectors |
| EGFP-C-FOR                 |                              | CATGGTCCTGCTGGAGTTCGTG                                                                                              |                                                                 |
